# Supplementary material for: Rational design of graphdiyne-based single-atom catalysts for electrochemical CO2 reduction reaction
Source: Royal Society of Chemistry journal article supplement (doi:10.1039/d4ra04643a), 2024-01-01
Supplement: d4ra04643a1.pdf [file d4ra04643a1.pdf]

## **Rational design of graphdiyne-based single-atom catalysts for electrochemical CO<sub>2</sub> reduction reaction**

Liyun Jiang<sup>1,3</sup>, Mengdie Zhao<sup>2,3</sup>, Qi Yu<sup>2,\*</sup>

*<sup>1</sup> School of Physics and Telecommunication Engineering, Shaanxi University of Technology,  
Hanzhong 723001, China*

*<sup>2</sup> School of Materials Science and Engineering, and Shaanxi Laboratory of Catalysis, Shaanxi  
University of Technology, Hanzhong 723001, China*

*<sup>3</sup> These authors contributed equally*

\*Corresponding author:

[qiyu@snut.edu.cn](mailto:qiyu@snut.edu.cn) (Qi. Yu)

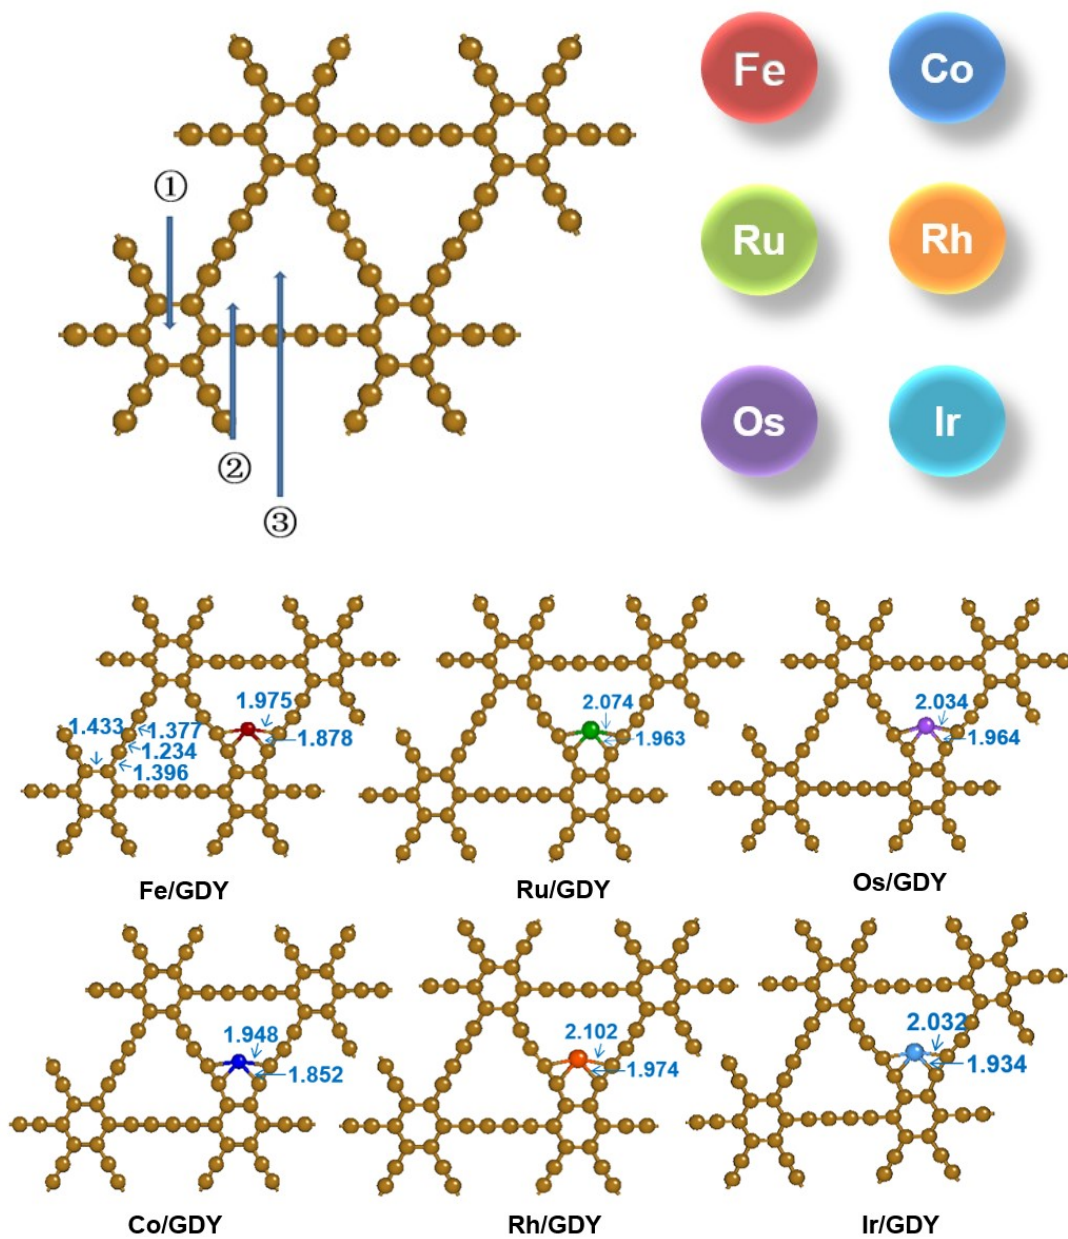

**Figure S1.** The optimized structure of  $\text{TM}_1/\text{GDY}$  and the schematic of screening site GDY.

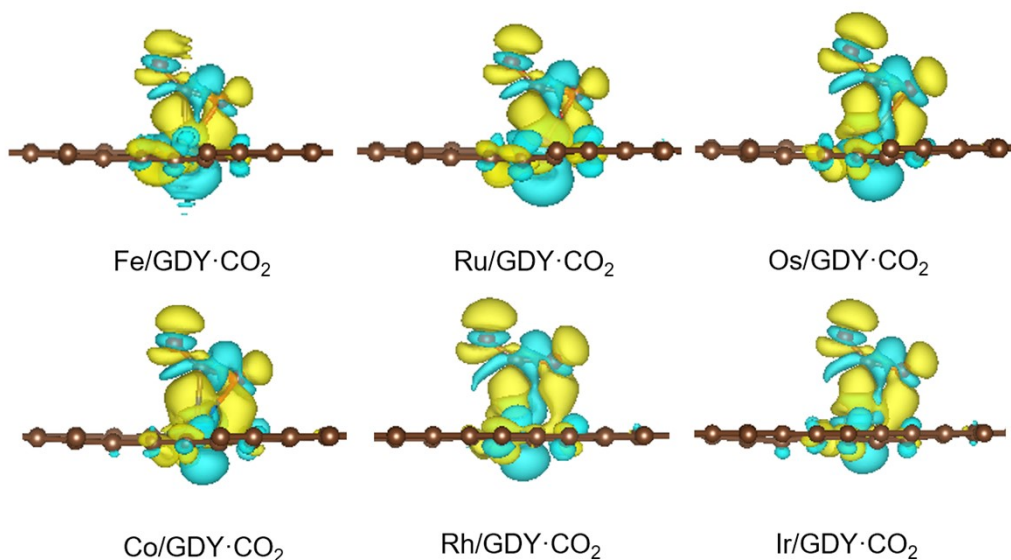

**Figure S2.** Differential charge density diagram of CO<sub>2</sub> adsorbed by TM<sub>1</sub>/GDY.

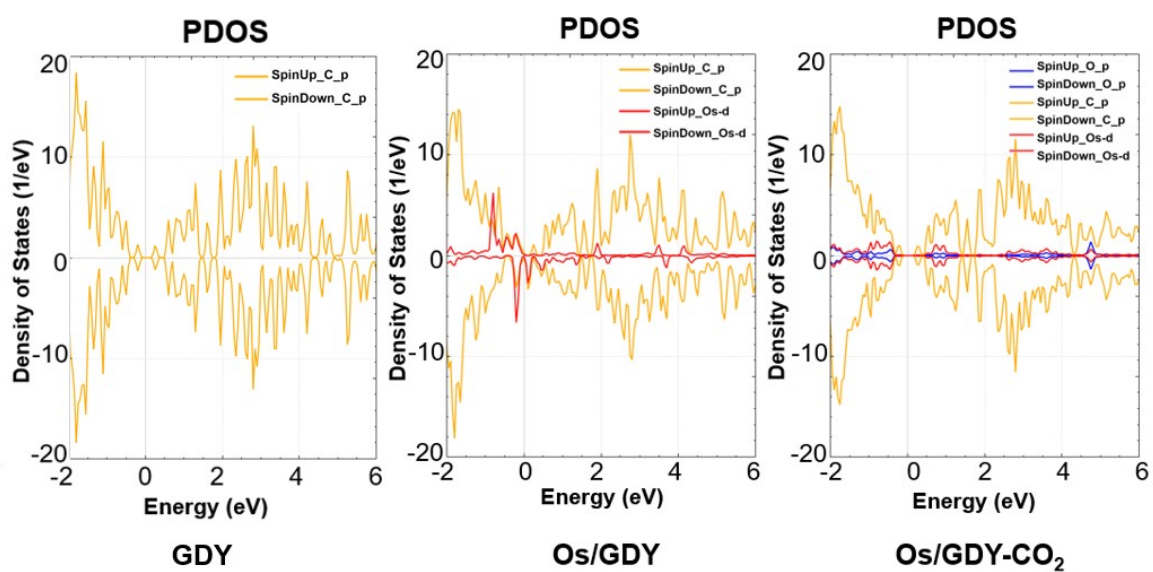

**Figure S3.** The schematic diagram of projected electronic densities of states of GDY, Os<sub>1</sub>/GDY, and Os<sub>1</sub>/GDY-CO<sub>2</sub>.

**Table S1 The change of free energy in the first protonation step of CO<sub>2</sub>RR adsorption and HER on TM<sub>1</sub>/GDY catalysts.**

| SACs   | $\Delta G_{\text{HER}}$ (eV) | $\Delta G_{\text{CO}_2\text{RR}}$ (eV) |
|--------|------------------------------|----------------------------------------|
| Fe/GDY | 0.16                         | 0.31                                   |
| Ru/GDY | -0.95                        | -0.69                                  |
| Os/GDY | -1.15                        | -0.51                                  |
| Co/GDY | 0.18                         | 0.43                                   |
| Rh/GDY | -0.31                        | 0.39                                   |
| Ir/GDY | -0.47                        | 0.24                                   |

**Table S2 The free energies of CO<sub>2</sub>RR on Os/GDY.**

| CO <sub>2</sub> RR                       | $\Delta G$ (eV) |
|------------------------------------------|-----------------|
| CO <sub>2</sub> → *CO <sub>2</sub>       | -0.52           |
| *CO <sub>2</sub> → *COOH                 | -0.57           |
| *COOH → *CO                              | -1.40           |
| *CO → *COH                               | -0.14           |
| *CO → *CHO                               | -0.79           |
| *CHO → *CHOH                             | -0.91           |
| *CHO → *CH <sub>2</sub> O                | -1.17           |
| *CH <sub>2</sub> O → *CH <sub>2</sub> OH | -1.03           |
| *CH <sub>2</sub> O → *CH <sub>3</sub> O  | -1.66           |
| *CH <sub>3</sub> O → *CH <sub>3</sub> OH | -0.88           |
| *CH <sub>3</sub> O → *OCH <sub>4</sub>   | -2.33           |
| *OCH <sub>4</sub> → CH <sub>4</sub>      | -2.12           |
